# Comprehensive Bee Pathogen Screening in Belgium Reveals *Crithidia mellificae* as a New Contributory Factor to Winter Mortality

Jorgen Ravoet<sup>1\*</sup>, Jafar Maharramov<sup>2</sup>, Ivan Meeus<sup>2</sup>, Lina De Smet<sup>1</sup>, Tom Wenseleers<sup>3</sup>, Guy Smaghe<sup>2</sup>, Dirk C. de Graaf<sup>1</sup>

**1** Laboratory of Zoophysiology, Faculty of Sciences, Ghent University, Ghent, Belgium, **2** Department of Crop Protection, Faculty of Bioscience Engineering, Ghent University, Ghent, Belgium, **3** Laboratory of Socioecology and Social Evolution, K.U.Leuven, Leuven, Belgium

## Abstract

Since the last decade, unusually high honey bee colony losses have been reported mainly in North-America and Europe. Here, we report on a comprehensive bee pathogen screening in Belgium covering 363 bee colonies that were screened for 18 known disease-causing pathogens and correlate their incidence in summer with subsequent winter mortality. Our analyses demonstrate that, in addition to *Varroa destructor*, the presence of the trypanosomatid parasite *Crithidia mellificae* and the microsporidian parasite *Nosema ceranae* in summer are also predictive markers of winter mortality, with a negative synergy being observed between the two in terms of their effects on colony mortality. Furthermore, we document the first occurrence of a parasitizing phorid fly in Europe, identify a new fourth strain of Lake Sinai Virus (LSV), and confirm the presence of other little reported pathogens such as *Apicystis bombi*, Aphid Lethal Paralysis Virus (ALPV), *Spiroplasma apis*, *Spiroplasma melliferum* and *Varroa destructor* Macula-like Virus (VdMLV). Finally, we provide evidence that ALPV and VdMLV replicate in honey bees and show that viruses of the LSV complex and Black Queen Cell Virus tend to non-randomly co-occur together. We also noticed a significant correlation between the number of pathogen species and colony losses. Overall, our results contribute significantly to our understanding of honey bee diseases and the likely causes of their current decline in Europe.

**Citation:** Ravoet J, Maharramov J, Meeus I, De Smet L, Wenseleers T, et al. (2013) Comprehensive Bee Pathogen Screening in Belgium Reveals *Crithidia mellificae* as a New Contributory Factor to Winter Mortality. PLoS ONE 8(8): e72443. doi:10.1371/journal.pone.0072443

**Editor:** Yi Li, Wuhan Bioengineering Institute, China

**Received:** May 28, 2013; **Accepted:** July 9, 2013; **Published:** August 26, 2013

**Copyright:** © 2013 Ravoet et al. This is an open-access article distributed under the terms of the Creative Commons Attribution License, which permits unrestricted use, distribution, and reproduction in any medium, provided the original author and source are credited.

**Funding:** Research Foundation of Flanders (FWO-Vlaanderen G.0628.11), European Union (7th Framework Program BEEDOC: FP7-KBBE-2009-3 244956 CP-FP). The funders had no role in study design, data collection and analysis, decision to publish, or preparation of the manuscript.

**Competing Interests:** Co-author Prof. Guy Smaghe is a PLOS ONE Editorial Board member. This does not alter the authors' adherence to all the PLOS ONE policies on sharing data and materials.

\* E-mail: Jorgen.Ravoet@UGent.be

## Introduction

Pollination is vital to the functioning of natural ecosystems, boosting the reproduction of wild plants, on which many other organisms depend. Likewise, many fruit, nut, vegetable and seed crops cultivated in an agricultural context depend on pollination. Honey bees (*Apis mellifera*) are considered the most economically valuable pollinators for crop monocultures worldwide [1].

However, over the last decade unusually high honey bee colony losses have been reported, mainly in North-America [2] and Europe [3]. There is a consensus nowadays that no single explanation can be given for these losses, and that there are several contributory factors to their decline, including pathogens, pesticides, nutrition and limited genetic diversity [2,4,5].

The ectoparasitic mite *Varroa destructor* is almost certainly a key player in causing the observed elevated colony losses [6–11]. This mite jumped from the Asian honey bee (*Apis cerana*) to the European honey bee (*Apis mellifera*) more than fifty years ago and has since become an almost cosmopolitan pest [12]. The mite weakens the bees by sucking hemolymph from both adult bees and pupae [13]. In addition, they can transmit many of the known honey bee viruses [14–18] and cause a reactivation of covert virus infections due to host immune suppression [19]. The mite

destabilizes the within-host dynamics of viruses due to this immune suppression, which can then reach lethal levels [20]. Further, *V. destructor* and Deformed Wing Virus (DWV) will reduce the life span of winter bees, which can cause a colony collapse [21].

So far, only three viruses have been correlated with colony losses: DWV, Acute Bee Paralysis Virus (ABPV) and Israeli Acute Bee Paralysis Virus (IAPV). ABPV and IAPV are members of a complex of closely related Dicistroviridae [22]. IAPV was initially identified as a predictive marker for colony losses in the USA [23]. An expanded study could not confirm this result [5]. Moreover, a retrospective study revealed that this virus was already present before the first colony collapse disorders were ever reported [24]. In Europe, ABPV was linked with colony losses in Belgium [25], Germany [10] and Switzerland [26]. Furthermore, DWV has been linked to winter mortality in both Switzerland [26] and Germany [10].

The role of the Microsporidian fungus *Nosema ceranae*, another parasite that originates from the Asian honey bee [27], in causing colony collapse is still controversial. Sudden colony collapses in Spain were attributed to *N. ceranae* infection [28,29], but these

observations could not be confirmed by later independent studies in and outside Spain [2,23,30–32].

Recently, a prospective study revealed the presence of the little reported pathogens *Crithidia mellificae*, *Spiroplasma apis* and *Spiroplasma melliferum* in large-scale migratory beekeeping operations in the USA. Furthermore, the novel viruses (Aphid Lethal Paralysis Virus (ALPV) strain Brookings, Big Sioux River Virus (BSRV), Lake Sinai Virus (LSV) 1 and 2) and the phorid fly *Apocephalus borealis* were discovered as honey bee pathogens [33]. Earlier descriptions of spiroplasmas in honey bees go back to the early eighties [34,35]. Also *C. mellificae* has been little studied since its first description in 1967 [36], even though the related *Crithidia bombi* is known to have serious effects on bumble bees, particularly under starvation conditions [37,38]. The prevalence of these and other new pathogens and their potential correlation with winter losses in Europe, where no large-scale migratory commercial beekeeping occurs, is at present unknown.

In 2011, we performed an epidemiological study of the most common honey bee viruses in Belgium [39]. As shortly afterwards several neglected and new honey bee pathogens were described in the USA [33], we decided to re-examine these samples in order to type them for several of these other known honeybee pathogens. Based on this, we here provide the first molecular evidence for the presence of parasitic phorid flies in honey bee samples in the Palaearctic region, and demonstrate the presence of two *Spiroplasma* spp., *Apicystis bombi*, ALPV strain Brookings, *C. mellificae*, different LSV strains and *Varroa destructor* Macula-like Virus (VdMLV) in Belgian honey bees. In addition, we examine whether the presence of these pathogens in the summer can be used as a

predictor of later winter mortality, and study possible associations in the prevalence of these pathogens.

## Materials and Methods

### Honey Bee Sampling and Preparation

For detailed description of the worker bee sampling procedure we refer to our previous paper [39]. In brief, in July 2011 around 30 bees were randomly sampled at the hive entrance of 363 colonies. RNA was extracted from 10 bees per colony for the molecular detection of pathogens. In addition, the natural *Varroa* drop was monitored by placing a sheet of paper under the open mesh floor during one week, and counting the mites in the laboratory. Optimization of the PCR for VdMLV was done on mites collected at the apiary of Ghent University, campus Sterre. This is a newly discovered virus in both mites and honey bees [40].

### MLPA Analysis

BeeDoctor [39], a ‘multiplex-ligation probe dependent amplification’ (MLPA) based method capable of detecting CBPV, DWV complex, ABPV complex, BQCV, SBPV and SBV, was expanded with probes to detect the positive and the negative strand each of BSRV, ALPV strain Brookings and viruses of the LSV complex (Table S1). Because of the high similarities of the two described LSV strains [33], we were unable to differentiate between them. This new prototype of BeeDoctor was used for screening purposes in the present study. All probes were synthesized by Integrated DNA Technologies (Leuven, Belgium). BeeDoctor analysis was performed as described before [39], starting from 1 µl RNA. All

**Table 1.** Honey bee pathogen incidences.

| Pathogen                      | Type                   | Prevalences     |                     |                     | Associations                     |                     |
|-------------------------------|------------------------|-----------------|---------------------|---------------------|----------------------------------|---------------------|
|                               |                        | Overall         | Surviving colonies* | Collapsed colonies* | Between pathogens                | With winter losses* |
| ABPV                          | Dicistroviridae        | 3.3% (12/363)   | 3.3% (4/122)        | 3.7% (4/107)        |                                  | No                  |
| ALPV                          | Dicistroviridae        | 56.2% (204/363) | 59.0% (72/122)      | 54.2% (58/107)      | <i>Nosema</i> spores (p = 0.011) | No                  |
| <i>Apicystis bombi</i>        | Ophryocystidae         | 40.8% (148/363) | 41.8% (51/122)      | 41.1% (44/107)      |                                  | No                  |
| <i>Apocephalus borealis</i>   | Phoridae               | 31.1% (118/363) | 32.8% (40/122)      | 33.6% (36/107)      |                                  | No                  |
| BQCV                          | Dicistroviridae        | 13.5% (49/363)  | 10.7% (13/122)      | 14.0% (15/107)      | LSV complex (p = 0.009)          | No                  |
| CBPV                          | Unclassified RNA virus | 1.7% (6/363)    | 0.0% (0/122)        | 1.9% (2/107)        |                                  | No                  |
| <i>Crithidia mellificae</i>   | Trypanosomatidae       | 70.5% (256/363) | 71.3% (87/122)      | 81.3% (87/107)      |                                  | Yes (p = 0.03)      |
| DWV                           | Iflaviridae            | 69.4% (252/363) | 61.5% (75/122)      | 67.3% (72/107)      |                                  | No                  |
| LSV complex                   | Unclassified RNA virus | 14.6% (43/363)  | 17.2% (21/122)      | 15.0% (16/107)      | BQCV (p = 0.009)                 | No                  |
| <i>Nosema apis</i>            | Nosematidae            | 10.2% (37/363)  | 13.1% (16/122)      | 10.3% (11/107)      |                                  | No                  |
| <i>Nosema ceranae</i>         | Nosematidae            | 92.6% (336/363) | 89.3% (109/122)     | 94.4% (101/107)     | VdMLV (p < 0.001)                | No                  |
| <i>Nosema</i> spores          | Nosematidae            | 75.2% (273/363) | 71.3% (87/122)      | 72.9% (78/107)      | ALPV (p = 0.011)                 | No                  |
| SBV                           | Iflaviridae            | 19.0% (69/363)  | 17.2% (21/122)      | 21.5% (23/107)      |                                  | No                  |
| <i>Spiroplasma apis</i>       | Spiroplasmataceae      | 0.3% (1/363)    | 0.0% (0/122)        | 0.0% (0/107)        |                                  | No                  |
| <i>Spiroplasma melliferum</i> | Spiroplasmataceae      | 4.4% (16/363)   | 3.3% (4/122)        | 6.5% (7/107)        |                                  | No                  |
| <i>Varroa destructor</i>      | Varroidae              | 93.7% (313/334) | 91.0% (111/122)     | 95.3% (102/107)     |                                  | Yes (p = 0.07)      |
| VdMLV                         | Tymoviridae            | 84.3% (306/363) | 79.5% (97/122)      | 84.1% (90/107)      | <i>N. ceranae</i> (p < 0.001)    | No                  |

Prevalences of honey bee pathogens found in Belgian honey bee colonies, the relationships between these pathogens and the effect of the occurrence of each pathogen on colony winter losses.

\*These data includes a subset of the samples (229), since 25% of the beekeepers did not provide data about winter losses of the monitored colonies.

doi:10.1371/journal.pone.0072443.t001

**Table 2.** Effects of the screened pathogens in summer on the observed honeybee winter mortality, based on probit models and exhaustive model searches in which the Akaike Information Criterion (AIC) was minimized.

| Pathogen                                                                                                             | Probit coefficients | Marginal odds ratios | LR $\chi^2$ | p value |
|----------------------------------------------------------------------------------------------------------------------|---------------------|----------------------|-------------|---------|
| <b>(a) Best model based on main effects only<sup>a</sup> (AIC 317.21)</b>                                            |                     |                      |             |         |
| Intercept                                                                                                            | -0.82               |                      |             |         |
| <i>Crithidia mellificae</i>                                                                                          | 0.37                | 1.3                  | 3.57        | 0.03    |
| <i>Varroa destructor</i>                                                                                             | 0.49                | 1.4                  | 2.11        | 0.07    |
| <b>(b) Best model based on most important main effects and their 1st order interactions<sup>b</sup> (AIC 316.11)</b> |                     |                      |             |         |
| Intercept                                                                                                            | -5.70               |                      |             |         |
| <i>Crithidia mellificae</i>                                                                                          | 5.09                | 1.3                  | 6.16        | 0.01    |
| <i>Nosema ceranae</i>                                                                                                | 4.97                | 1.4                  | 4.88        | 0.03    |
| <i>Varroa destructor</i>                                                                                             | 0.49                | 1.4                  | 2.10        | 0.07    |
| <i>Crithidia mellificae</i> x <i>Nosema ceranae</i>                                                                  | -4.80               | 0.8                  | 3.37        | 0.03    |

<sup>a</sup>Based on an exhaustive search with the following set of predictor variables: presence or absence of *N. apis*, *N. ceranae*, *C. mellificae*, *A. bombi*, *S. melliferum*, *A. borealis*, ALPV, DWV, BQCV, SBV, LSV, VDMLV, *V. destructor* as well as the natural *V. destructor* drop and *Nosema* spore load.

<sup>b</sup>Based on an exhaustive search, including all pathogens which occurred in more than 10 out of 229 colonies and which in a full main effects model had probit coefficients >0.2 (*N. ceranae*, *C. mellificae*, *V. destructor*, *S. melliferum* and BQCV) and DWV, which has been linked to winter mortality before [10,26], as well as their first order interaction effects.

doi:10.1371/journal.pone.0072443.t002

the MLPA reagents were obtained from MRC-Holland. The amplified MLPA products were analysed using 4% high resolution agarose gel electrophoresis.

#### PCR Analysis

Five  $\mu$ l RNA (variable concentration) was retro-transcribed using random hexamer primers with the RevertAid<sup>TM</sup> First Strand cDNA Synthesis Kit (Thermo Scientific), according to the manufacturer's instructions. All PCR reaction mixtures contained

2  $\mu$ M of each primer; 1.5 mM MgCl<sub>2</sub>; 0.2 mM dNTP; 1.25 U Hotstar Taq DNA polymerase (Qiagen) and 1  $\mu$ l cDNA product.

The primers used are shown in Table S1. Temperature cycles for slowly-evolving trypanosomatids and neogregarines were as described [39], but PCRs were performed in their uniplex mode. Samples that were positive for trypanosomatids were sequenced to confirm the presence of *C. mellificae*. Positive samples of neogregarines were subsequently re-analyzed with *A. bombi*-specific primers. Fifteen amplicons were sequenced for verification. Spiroplasmas were detected as described [41], based on the 16S

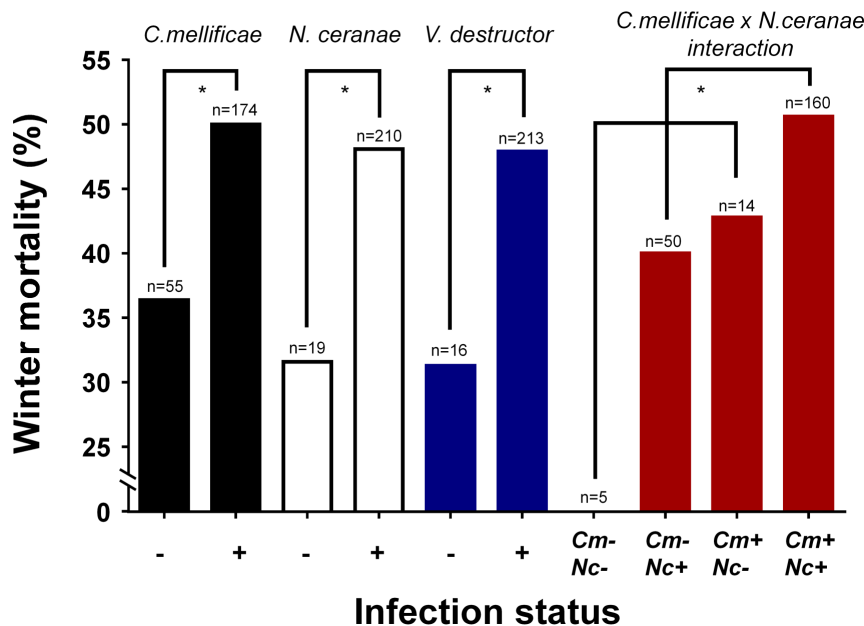

**Figure 1. Effect of *Crithidia mellificae*, *Nosema ceranae* and *Varroa destructor* on honey bee colony winter losses.** The presence of *C. mellificae*, *N. ceranae* and *V. destructor* in summer all increase later winter mortality (binomial probit model, Table 2b,  $p=0.01$ ,  $0.03$  and  $0.07$ , respectively). In addition, there is a synergistic effect of *C. mellificae* and *N. ceranae* on winter mortality (Table 2b,  $p=0.03$ ). Cm = *C. mellificae*, Nc = *N. ceranae*.

doi:10.1371/journal.pone.0072443.g001

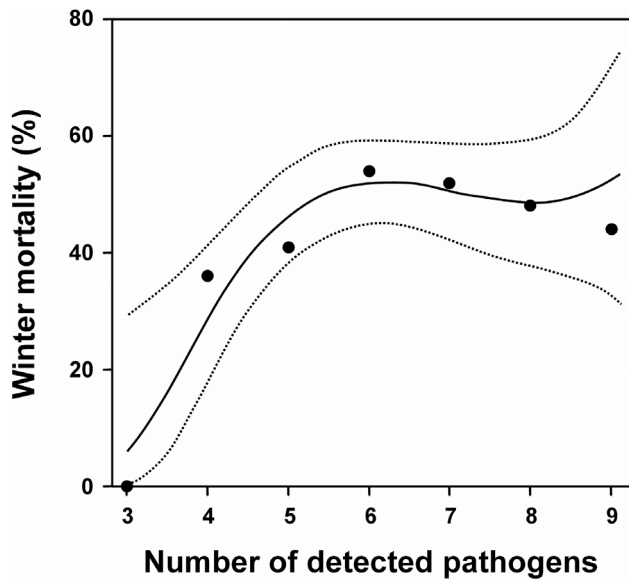

**Figure 2. Effect of the number of detected pathogens on winter mortality, based on a third order binomial probit model.** The predicted winter mortality goes up markedly when the number of detected pathogens increase from 3 to 6 (from 5.9% to 52%), but then stabilizes around 50% when colonies have higher total numbers of pathogens.

doi:10.1371/journal.pone.0072443.g002

ribosomal RNA sequence. Due to unspecific bands from *N. ceranae* rRNA around 700 bp, only universal *Spiroplasma* primers were used. Amplicons around 1 kb were extracted using the GeneJET Gel Extraction Kit (Thermo Scientific) and sequenced for *S. apis* and *S. melliferum* differentiation. For the differentiation of *Nosema apis* and *N. ceranae*, PCR conditions described by [42,43] were used. Samples negative with these primers but positive for *Nosema* spore counting, were re-analyzed with primers specific for Microsporidia. A subset of the amplicons was sequenced for verification.

In order to detect the LSV strain 1 and 2, we followed the procedure described by [33]. However, when other strains appeared to be present we developed a PCR to detect a partial sequence of the Orf1 and RNA-dependent RNA polymerase genes of any known member of the LSV complex (strain 1, 2 and 3 at that time) using a degenerated primer set and the following cycling conditions: 94°C for 15 min; 94°C for 30 sec, 60°C for 30 sec, 72°C for 1 min; 35 cycles; final elongation 72°C for 10 min; hold at 4°C. Amplicons around 600 bp were extracted and sequenced. Temperature cycles for Microsporidia, Phoridae, ALPV and VdMLV were as described above, but with the annealing temperature set at respectively 60°C, 59°C, 60°C and 51°C. All PCR products were electrophoresed in 1.4% agarose gels, stained with ethidium bromide and visualised under UV light.

We developed a positive control for the Phoridae PCR and the MLPA-based detection of ALPV and BSRV by synthesizing 486-mer, 160-mer and 190-mer oligonucleotides respectively in a pIDTsmat vector (done by Integrated DNA Technologies). In other cases, the first positive sample detected in preliminary screenings served as a positive control.

### Cloning and Sequencing

Amplicons of ALPV strain Brookings, LSV complex, VdMLV and Phoridae were cloned into the pCR4 TOPO vector from TOPO TA Cloning Kit for sequencing (Invitrogen, USA)

according to manufacturer's instructions. The cloned inserts were sequenced on an ABI 3130XL platform using M13 primers after isolation of the plasmids with the GeneJet™ Plasmid Miniprep kit (Thermo Scientific).

DNA sequences obtained by direct sequencing of amplicons or by sequencing cloned PCR products were BLAST-searched at <http://blast.ncbi.nlm.nih.gov/>. Alignments of the LSV amplicons and strict consensus sequences (100% threshold) from LSV 1 (Genbank: HQ871931), LSV 2 (Genbank: HQ888865) and LSV 3 (Genbank: JQ480620) RNA polymerases and Orf1 genes were generated with Geneious 5.6.4.

### Nosema Spore Counting

We determined the *Nosema* spore levels in the extracts from 10 bees using light microscopy and a haemocytometer according to Cantwell [44]. This extract was diluted when necessary.

### Statistics

The multiple-kind lottery model of [45] was used to infer the theoretical distribution of pathogens in surviving and collapsed colonies. By use of the individual infection percentage of each pathogen ( $n = 16$ ) the model calculates the expected pathogen distribution or the number of colonies infected with 0 to 16 pathogens. As described earlier [46], significant deviations between the observed and theoretically predicted pathogen distributions imply an interaction between different pathogens in this multi-pathogen host system. By means of a Pearson Chi-square test ( $P < 0.05$ ) with SPSS 21.0 we compared if the observed pathogen distribution differed from the theoretical distribution. The same approach was followed to infer which interaction between pathogen pairs occurred within this multi-pathogen host system.

Pathogen prevalence was correlated with winter mortality using a binomial generalized linear model with probit link function using function *glm* in package *stats* in R 2.16. This analysis was performed with a subset of the samples (229), since we excluded colonies for which the beekeepers did not provide any data on winter mortality, as well as colonies that had undergone queen supersedure. To select the most parsimonious model we used an exhaustive search based on the Akaike Information Criterion (AIC). This was done using R package *glmulti*, based on a set of predictor variables which either included all main effects (but excluding pathogens *S. apis*, CBPV and ABPV, since they occurred in fewer than 10 out of 229 colonies), or one which also considered possible first order interaction effects, and which included the pathogens which in a full main effects model had probit coefficients  $> 0.2$  (*N. ceranae*, *C. mellificae*, *V. destructor*, *S. melliferum* and BQCV) as well as DWV, which had been linked to winter mortality before [10,26]. In addition, we also ran a model in which all main effects were included as well as a first and third order polynomial model in which the total number of detected pathogens was used as a predictor of winter mortality. Significance was assessed using Type III likelihood ratio tests using function *Anova* in R package *car*. In all cases, one-sided  $p$ -levels were used, since pathogens a priori are expected to increase colony mortality. The predictive power of our resulting models was assessed using function *CVbinary* in R package *DAAG*.

## Results

### Survey of Pathogens

An overview of the prevalences of the investigated pathogens is given in Table 1. The natural *Varroa destructor* drop ranged from 0 to more than 500 mites per week. A value equal to 0 does not

**A**

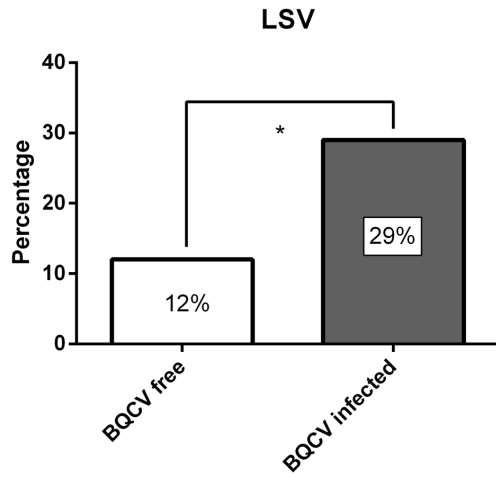

**B**

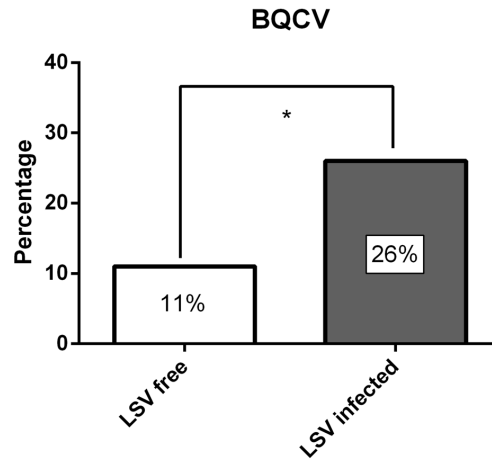

**C**

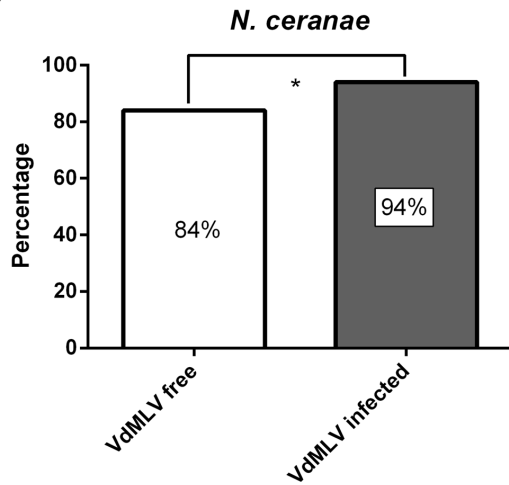

**D**

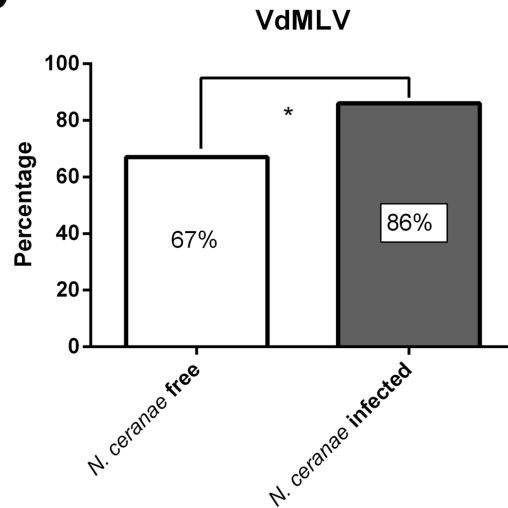

**E**

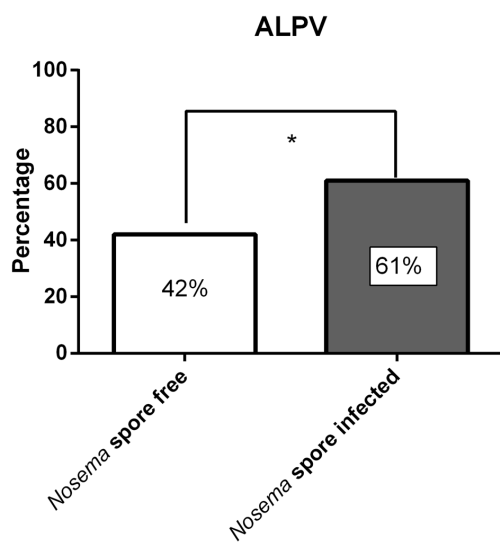

**F**

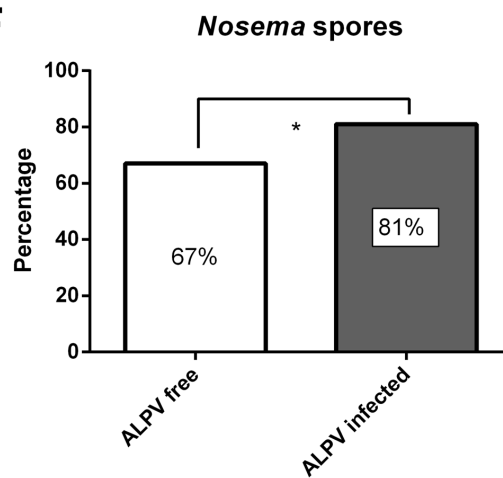

**Figure 3. Graphical representation of significant pathogen correlations.** LSV complex is significantly associated with BQCV ( $p=0.009$ ) (A and B), VdMLV with *N. ceranae* ( $p<0.001$ ) (C and D) and ALPV strain Brookings with *Nosema* spores ( $p=0.011$ ) (E and F). doi:10.1371/journal.pone.0072443.g003

necessarily imply that the colony is uninfected, only that the *Varroa* drop is below the detection limit. Within the boundaries, a prevalence of 93.7% (313/334) was found. *Nosema* spores were found in 75.2% (273/363) of the samples, and ranged from  $10^5$  till  $10^9$  per bee. PCR-based detection reveals 10.2% *N. apis* infection (37/363) and 92.6% *N. ceranae* infection (336/363), accounting for a total *Nosema* prevalence of 93.9% (341/363). Mixed infections, single *N. apis* and *N. ceranae* infection occurred in respectively 8.8% (32/363), 1.4% (5/363) and 83.7% (304/363) of the samples.

Amplicons had an almost complete nucleotide similarity with sequences of *N. apis* (Genbank: U97150) or *N. ceranae* (Genbank: DQ486027).

While an ALPV strain and different LSV strains were fairly abundant, with prevalences of 56.2% (204/363) and 14.6% (43/363) in our studied colonies, BSRV could not be detected. ALPV amplicons shared 97% nucleotide identity with two strains isolated from honey bees (Genbank: HQ871932; JX045858) and 89% with the canonical ALPV sequence (Genbank: AF536531). At the amino acid level, our isolates (Genbank: KC880119) appeared to be identical to ALPV strain Brookings and 99% identical to a Spanish strain (Genbank: JX045858), caused by one substitution of valine to isoleucine. Moreover, we could show that ALPV and VdMLV are replicating in honey bees by demonstrating the presence of their negative strand intermediate, a marker for replication of positive sense single stranded RNA viruses, by a strand specific MLPA reaction. Surprisingly, VdMLV was detected in the majority of our bee samples (84.3%; 306/363). The Belgian strain (Genbank: KC880120) showed high sequence homology (97% on nucleotide level, 99% on amino acid level) with a French strain (Genbank: HQ916350).

The spiroplasmas *S. apis* and *S. melliferum* were found only in respectively 0.3% (1/363) and 4.4% (16/363) of the tested samples. One sequence appeared 100% identical to the *S. apis* strain ATCC 33834 (Genbank: GU993267); all others matched to *S. melliferum* IPMB4A (Genbank: JQ347516) (4 sequences with 100% identity and 6 sequences with only a single nucleotide substitution).

The little reported trypanosomatid *C. mellificae* was found in 70.5% (256/363) of the samples. The amplicons showed 100% sequence identity with a partial sequence of the small subunit ribosomal RNA of *C. mellificae* (Genbank: AB745488). We also found molecular evidence that the neogregarine *A. bombi*, primarily known as a bumble bee parasite [47], was present in 40.8% (148/363) of our samples. The 15 sequenced amplicons showed 100% identity with a partial small subunit ribosomal RNA sequence of *A. bombi* (Genbank: FN546182).

Unexpectedly, we were also able to demonstrate the molecular presence of phorid flies in 31.1% (118/363) of the samples. These amplicons fully matched a partial *A. borealis* 18S ribosomal RNA sequence (Genbank: JF808447).

### Identification of the LSV Strains

In order to determine which LSV strains we had found by MLPA, we re-investigated the positive samples by PCR using the primers specific for LSV 1 and LSV 2 [33]. These specific primers did not work on our samples and therefore a degenerated primer set was developed. The sequence of the amplicons generated with the degenerated primer set revealed one sample (Genbank: KC880123) with high resemblance to a known strain (Genbank: JQ480620) (96% nucleotide and 94% amino acid identity with

LSV 3, a third LSV type that was described in the meanwhile [48]), while others gave only moderate similarity to any of them (Genbank: KC880121, KC880122, KC880124-KC880126). Amplicons from six apiaries had the same trimmed sequence, which aligned very well with the consensus sequence of the RNA-dependent RNA polymerases of the three different strains (Figure S1). We designated this sequence representative for a new fourth strain of LSV (Genbank: JX878492). The LSV Orf1 sequences showed a high degree of sequence divergence (data not shown) but the majority of the conserved Orf1 amino acids were also retrieved in LSV 4 and our other sequences.

### Effect of Pathogens on Colony Winter Losses

Overall, 46.5% of the sampled colonies were reported to be lost over the winter of 2011–2012. Combined with our data on the prevalence of 16 known honeybee pathogens in these colonies in summer (July 2011), including several little reported ones detected in the present paper, but also the more common viruses detected previously in these samples [39], we decided to test whether these winter losses could be predicted on the bases of the presence or absence of these pathogens (Table 1).

Based on a probit binomial model in which only main effects were considered, an exhaustive model search showed that *V. destructor* and *C. mellificae* contributed most to explaining winter mortality (AIC = 317.21) (*C. mellificae*:  $p=0.03$ , marginal odds ratio = 1.3; *V. destructor*:  $p=0.07$ , marginal odds ratio = 1.3, Table 2a). Nevertheless, if we also included first order interaction effects and carried out an exhaustive search we obtained a model with slightly better explanatory power (AIC = 316.11). *C. mellificae*, *N. ceranae*, *V. destructor* and as well as the interaction effect *C. mellificae* × *N. ceranae*, significantly contributed to explaining winter mortality in this model ( $p=0.01$ , 0.02, 0.07 and 0.03, respectively; Table 2 and Figure 1). The significant interaction effect was due a negative synergy between *C. mellificae* and *N. ceranae* on winter mortality (Figure 1). It means that the combination of both pathogens has a lesser output than the sum of each pathogen. Nevertheless, a clear enhancing effect can still be observed. Based on this model, the accuracy of the prediction of whether a colony would die or not in the winter was 55% using internal estimates, or 52% using cross-validation. Overall, higher numbers of detected pathogens in summer also resulted in a significantly increased winter mortality, as shown by a first order probit model (AIC = 316.93,  $p=0.03$ ). In addition, the use of a third order probit model further increased the accuracy of the fit to the data (AIC = 316.12), and resulted in a significantly positive first order effect ( $p=0.02$ ) and a significantly negative second order effect ( $p=0.03$ ) of the number of detected pathogens on winter mortality (Figure 2). When the amount of detected pathogens increases from 3 to 6 (from 5.9% to 52%), the predicted winter mortality goes up markedly but stabilizes around 50% at higher numbers of pathogen species.

### Relationships between Pathogens

As determined by a Pearson Chi-square test, we found evidence for positive associations between different pathogens ( $p<0.05$ ). LSV was significantly associated with BQCV ( $\chi^2=9.41$ ,  $df=2$ ,  $p=0.009$ ), ALPV with *Nosema* spores ( $\chi^2=9.087$ ,  $df=2$ ,  $p=0.011$ ) and VdMLV with *N. ceranae* ( $\chi^2=28.067$ ,  $df=2$ ,  $p<0.001$ ). These pathogen associations are presented graphically in Figure 3.

## Discussion

Overall, our data represent among the most comprehensive prevalence studies of honey bee pathogens carried out to date in Europe. The recent discovery of new bee viruses and neglected parasites in several countries highlighted the narrow window of pathogens that are the subject of many monitoring programs. As a result, we decided to re-investigate samples from July 2011 and statistically analyze whether the detected pathogens in summer had any effect on the winter mortality.

Our analysis confirmed the importance of *V. destructor* in summer as a marker for colony collapses [7] (Figure 1). Importantly, our analysis also demonstrated a large effect of the occurrence of *C. mellificae* in summer on later winter losses, even enhanced through *N. ceranae* co-infection (Figure 1). The protozoan *C. mellificae* has been ignored for a long time, but the current data highlight it as a new putative key player in honey bee colony declines. This trypanosome has probably a cosmopolitan distribution since it has been reported in Australia [36], China [49], France [50], Japan [51], Switzerland [52] and USA [33]. Besides, the related *C. bombi*, also reported from Asian honey bees [53], has serious effects on the survival of bumble bees under stress conditions [37]. Recently, complex dynamic immune responses to *C. mellificae* infection were reported, with a distinct response when individuals were infected with *C. mellificae* and *N. ceranae* simultaneously [54]. In addition, an association between both pathogens was reported in the USA [33]. Possibly, the controversial role of *N. ceranae* [23,29,55] might be explained by the synergistic effect of *N. ceranae* and *C. mellificae* on colony mortality. We also observed a significant correlation between the number of detected pathogens and colony losses, as was likewise reported in the USA [5]. Collapsing colonies, induced by e.g. *V. destructor* and *C. mellificae*, are probably more vulnerable to a diverse set of parasites [48], which elucidate this correlation. Moreover, it appeared that several pathogens can act synergistically and eventually cause a collapse of the honey bee colony [48]. The outcome of these pathogen interactions can vary between regions [48], probably because of the multifactorial origin of colony losses and the interplay between different stressors.

Additionally, our results confirm that Lake Sinai Viruses are a viral complex (Figure S1). Diverse viral sequences are reported in the USA [33,48] and Spain [56]. We could also confirm the presence of one known American LSV strain in Belgium, namely LSV 3. Another strain, designated LSV 4 (Genbank: JX878492), was retrieved in several independent samples. An ALPV strain was detected for the first time in Belgium. This virus was also detected in American [33] and Spanish honey bees [56]. Remarkable was its rather high incidence in the present study (56.2%; 204/363), akin to similar observations in different regions in the USA [33]. We could detect the presence of the ALPV negative strand intermediate, demonstrating that it is a replicating virus in honey bees. It is associated with the presence of *Nosema* spores, being indicative for a common oral transmission route. Another less known virus, VdMLV, was suggested to be a virus of *V. destructor*, which can be transmitted to honey bees [57]. Surprisingly, our study indicates a high prevalence in honey bees and a correlation with *N. ceranae*. The impact of this virus on honey bees remains unclear, but might well be significant since it replicates in honey bees.

The bacteria, *S. apis* and *S. melliferum*, are known as honey bee pathogens for a long time [34,35], including Asian honey bees [58]. They seem to be uncommon in honey bees, with a sudden incidence in the summer [33] which may be related to transmission via flowers.

Another unexpected discovery was the detection of phorid flies. Since the found amplicons had a 100% nucleotide similarity, we have strong molecular evidence that *A. borealis* or a similar phorid fly also infects honey bees outside the USA. To our knowledge this is the first description of a parasitizing phorid fly in honey bee samples in a Palaearctic region. This phorid fly was recently described as a new honey bee pathogen which alters the host behaviour by hive abandonment, eventually causing death [59].

Besides viruses, bacteria and fungi, honey bees can also be parasitized by neogregarines. Our study revealed a high prevalence of *Apicystis bombi* in honey bees. This parasite is believed to be highly virulent in bumble bee spring queens, but re-emerges later on in worker bumble bees [46]. However, real empirical data is missing to describe the pathology of *A. bombi*. After its detection in honey bees in Finland [47], *A. bombi* was also reported in honey bees in Japan [51] and Argentina [60].

The presence in Argentina is probably induced by spillover from invasive *Bombus terrestris* [61], an introduced pollinator outside the West Palaearctic area [62]. The high prevalence (40.8%; 148/363) of *A. bombi*, without correlation with winter losses, indicates that it is not highly virulent in honey bees. Surprisingly, unbiased molecular studies in the USA did not report the occurrence of this pathogen [23,48].

## Conclusions

Colony winter losses in Belgium seem to be associated with (1) *V. destructor* and (2) the detection of *C. mellificae* and *N. ceranae* in summer, with an enhancing effect on colony mortality being observed between the latter two. Thus, the present study not only extends the number of pathogens bees are exposed to in Europe, but also assigned the trypanosomid parasite *C. mellificae* as a new contributory factor to explain winter losses, in addition to the parasitic mite *V. destructor* and the microsporidian parasite *N. ceranae*. Moreover, the present study describes the occurrence of 6 new pathogens in Belgian honey bee: ALPV strain Brookings, VdMLV, viruses of the LSV complex, *S. melliferum*, *A. bombi* and *A. borealis*. This phorid fly and *S. melliferum* were hitherto not reported as honey bee pathogens in Europe before. From LSV a new fourth strain was discovered. Screening for negative strand intermediate of these viruses demonstrated replication of ALPV and VdMLV in honey bees, which had never been demonstrated before. Furthermore, we found associations between viruses of the LSV complex and BQCV, between VdMLV and *N. ceranae*, and between an ALPV strain and *Nosema* spores. The latter might indicate a common oral route of transmission. From our data it seems advisory to look at a broader range of pathogens in nationwide monitoring programs.

## Supporting Information

**Figure S1 Sequence variability of Lake Sinai Virus RNA-dependent RNA polymerase.** Amino acid alignment of a consensus sequence (generated from LSV 1, 2 and 3) with known and new Lake Sinai Virus RNA-dependent RNA polymerase sequences. (TIF)

**Table S1** Primers and MLPA probes used in this study. Half-probes used for detecting different honey bee viruses or virus species complexes through RT-MLPA and primers used for detecting honey bee viruses or other pathogens. Each RPO probe is 5'-phosphorylated (indicated by P<sup>-</sup>) to permit ligation of the 5' end of the RPO to the 3' end of the LPO. The PCR sequence tags on each halfprobe are in lower-case letters, the non-specific stuffer

sequences (for generating PCR products with pre-determined sizes) are shown in upper-case letters and the target-specific sequences are shown in underlined upper-case letters. (DOCX)

## Acknowledgments

The authors wish to thank the participating Flemish beekeepers.

## References

1. UNEP (2010) Global Honey Bee Colony Disorder and Other Threats to Insect Pollinators. UNEP Emerging Issues.
2. Vanengelsdorp D, Meixner MD (2010) A historical review of managed honey bee populations in Europe and the United States and the factors that may affect them. *J Invertebr Pathol* 103: S80–S95.
3. Potts SG, Roberts SPM, Dean R, Marris G, Brown MA, et al. (2010) Declines of managed honey bees and beekeepers in Europe. *J Apicult Res* 49: 15–22.
4. Evans JD, Schwarz RS (2011) Bees brought to their knees: microbes affecting honey bee health. *Trends Microbiol* 19: 614–620.
5. Vanengelsdorp D, Evans JD, Saegerman C, Mullin C, Haubruge E, et al. (2009) Colony Collapse Disorder: A Descriptive Study. *Plos One* 4: e6481.
6. Dahle B (2010) The role of Varroa destructor for honey bee colony losses in Norway. *J Apicult Res* 49: 124–125.
7. Dainat B, Evans JD, Chen YP, Gauthier L, Neumann P (2012) Predictive Markers of Honey Bee Colony Collapse. *Plos One* 7: e32151.
8. van Dooremalen C, Gerritsen L, Cornelissen B, van der Steen JJM, van Langevelde F, et al. (2012) Winter Survival of Individual Honey Bees and Honey Bee Colonies Depends on Level of Varroa destructor Infestation. *Plos One* 7: e36285.
9. Schafer MO, Ritter W, Pettis JS, Neumann P (2010) Winter Losses of Honeybee Colonies (Hymenoptera: Apidae): The Role of Infestations With Aethina taylori (Coleoptera: Nitidulidae) and Varroa destructor (Parasitiformes: Varroidae). *Journal of Economic Entomology* 103: 10–16.
10. Genersch E, von der Ohe W, Kaatz H, Schroeder A, Otten C, et al. (2010) The German bee monitoring project: a long term study to understand periodically high winter losses of honey bee colonies. *Apidologie* 41: 332–352.
11. Guzman-Novoa E, Eccles L, Calvete Y, McGowan J, Kelly PG, et al. (2010) Varroa destructor is the main culprit for the death and reduced populations of overwintered honey bee (*Apis mellifera*) colonies in Ontario, Canada. *Apidologie* 41: 443–450.
12. Anderson DL, Trueman JWH (2000) Varroa jacobsoni (Acari : Varroidae) is more than one species. *Exp Appl Acarol* 24: 165–189.
13. Garedew A, Schmolz E, Lamprecht I (2004) The energy and nutritional demand of the parasitic life of the mite Varroa destructor. *Apidologie* 35: 419–430.
14. Bowen-Walker PL, Martin SJ, Gunn A (1999) The transmission of deformed wing virus between honeybees (*Apis mellifera* L.) by the ectoparasitic mite Varroa jacobsoni Oud. *J Invertebr Pathol* 73: 101–106.
15. Di Prisco G, Pennacchio F, Caprio E, Boncristiani HF, Evans JD, et al. (2011) Varroa destructor is an effective vector of Israeli acute paralysis virus in the honeybee, *Apis mellifera*. *J Gen Virol* 92: 151–155.
16. Chen YP, Pettis JS, Evans JD, Kramer M, Feldlaufer MF (2004) Transmission of Kashmir bee virus by the ectoparasitic mite Varroa destructor. *Apidologie* 35: 441–448.
17. Shen MQ, Yang XL, Cox-Foster D, Cui LW (2005) The role of varroa mites in infections of Kashmir bee virus (KBV) and deformed wing virus (DWV) in honey bees. *Virology* 342: 141–149.
18. Genersch E, Aubert M (2010) Emerging and re-emerging viruses of the honey bee (*Apis mellifera* L.). *Veterinary Research* 41: 54.
19. Yang XL, Cox-Foster DL (2005) Impact of an ectoparasite on the immunity and pathology of an invertebrate: Evidence for host immunosuppression and viral amplification. *P Natl Acad Sci USA* 102: 7470–7475.
20. Nazzi F, Brown SP, Ansochia D, Del Piccolo F, Di Prisco G, et al. (2012) Synergistic Parasite-Pathogen Interactions Mediated by Host Immunity Can Drive the Collapse of Honeybee Colonies. *Plos Pathog* 8: e1002735.
21. Dainat B, Evans JD, Chen YP, Gauthier L, Neumann P (2012) Dead or alive: deformed wing virus and Varroa destructor reduce the life span of winter honeybees. *Appl Environ Microbiol* 78: 981–987.
22. de Miranda JR, Cordoni G, Budge G (2010) The Acute bee paralysis virus-Kashmir bee virus-Israeli acute paralysis virus complex. *J Invertebr Pathol* 103: S30–S47.
23. Cox-Foster DL, Conlan S, Holmes EC, Palacios G, Evans JD, et al. (2007) A metagenomic survey of microbes in honey bee colony collapse disorder. *Science* 318: 283–287.
24. Chen YP, Evans JD (2007) Historical presence of Israeli acute paralysis virus in the United States. *Am Bee J* 147: 1027–1028.
25. Nguyen BK, Ribiere M, Vanengelsdorp D, Snoeck C, Saegerman C, et al. (2011) Effects of honey bee virus prevalence, Varroa destructor load and queen condition on honey bee colony survival over the winter in Belgium. *J Apicult Res* 50: 195–202.
26. Berthoud H, Imdorf A, Haueter M, Radloff S, Neumann P (2010) Virus infections and winter losses of honey bee colonies (*Apis mellifera*). *J Apicult Res* 49: 60–65.
27. Fries I, Feng F, daSilva A, Slemenda SB, Pieniack NJ (1996) Nosema ceranae n sp (Microspora, Nosematidae), morphological and molecular characterization of a microsporidian parasite of the Asian honey bee *Apis cerana* (Hymenoptera, Apidae). *Eur J Protistol* 32: 356–365.
28. Higes M, Martin-Hernandez R, Botias C, Bailon EG, Gonzalez-Porto AV, et al. (2008) How natural infection by Nosema ceranae causes honeybee colony collapse. *Environ Microbiol* 10: 2659–2669.
29. Higes M, Martin-Hernandez R, Garrido-Bailon E, Gonzalez-Porto AV, Garcia-Palencia P, et al. (2009) Honeybee colony collapse due to Nosema ceranae in professional apiaries. *Env Microbiol Rep* 1: 110–113.
30. Fernandez JM, Puerta F, Cousinou M, Dios-Palomares R, Campano F, et al. (2012) Asymptomatic presence of Nosema spp. in Spanish commercial apiaries. *J Invertebr Pathol* 111: 106–110.
31. Gisdler S, Hedtke K, Mockel N, Frielitz MC, Linde A, et al. (2010) Five-Year Cohort Study of Nosema spp. in Germany: Does Climate Shape Virulence and Assertiveness of Nosema ceranae? *Appl Environ Microb* 76: 3032–3038.
32. Invernizzi C, Abud C, Tomasco IH, Harriet J, Ramallo G, et al. (2009) Presence of Nosema ceranae in honeybees (*Apis mellifera*) in Uruguay. *J Invertebr Pathol* 101: 150–153.
33. Runckel C, Flenniken ML, Engel JC, Ruby JG, Ganem D, et al. (2011) Temporal Analysis of the Honey Bee Microbiome Reveals Four Novel Viruses and Seasonal Prevalence of Known Viruses, Nosema, and Crithidia. *Plos One* 6: e20656.
34. Clark TB, Whitcomb RF, Tully JG, Mouches C, Saillard C, et al. (1985) Spiroplasma melliferum, A New Species from the Honeybee (*Apis mellifera*). *International Journal of Systematic Bacteriology* 35: 296–308.
35. Mouches C, Bove JM, Tully JG, Rose DL, McCoy RE, et al. (1983) Spiroplasma apis, A New Species from the Honeybee *Apis mellifera*. *Ann Inst Pasteur Mic A134*: 383–397.
36. Langridge DF, Mcghee RB (1967) Crithidia mellificae n sp: An Acidophilic Trypanosomatid of Honey Bee *Apis mellifera*. *J Protozool* 14: 485–8.
37. Brown MJF, Loosli R, Schmid-Hempel P (2000) Condition-dependent expression of virulence in a trypanosome infecting bumblebees. *Oikos* 91: 421–427.
38. Brown MJF, Schmid-Hempel R, Schmid-Hempel P (2003) Strong context-dependent virulence in a host-parasite system: reconciling genetic evidence with theory. *Journal of Animal Ecology* 72: 994–1002.
39. De Smet L, Ravot J, de Miranda JR, Wenseleers T, Mueller MY, et al. (2012) BeeDoctor, a Versatile MLPA-Based Diagnostic Tool for Screening Bee Viruses. *Plos One* 7: e47953.
40. Gauthier L, Ravallec M, Tournaire M, Cousserans F, Bergoin M, et al. (2011) Viruses Associated with Ovarian Degeneration in *Apis mellifera* L. Queens. *Plos One* 6: e16217.
41. Meeus I, Vercruyse V, Smagghe G (2012) Molecular detection of Spiroplasma apis and Spiroplasma melliferum in bees. *J Invertebr Pathol* 109: 172–174.
42. Chen Y, Evans JD, Smith IB, Pettis JS (2008) Nosema ceranae is a long-present and wide-spread microsporidian infection of the European honey bee (*Apis mellifera*) in the United States. *J Invertebr Pathol* 97: 186–188.
43. Chen Y, Evans JD, Zhou L, Boncristiani H, Kimura K, et al. (2009) Asymmetrical coexistence of Nosema ceranae and Nosema apis in honey bees. *J Invertebr Pathol* 101: 204–209.
44. Cantwell GE (1970) Standard methods for counting nosema spores. *Am Bee J* 110: 222–223.
45. Janovy J, Clopton RE, Clopton DA, Snyder SD, Efting A, et al. (1995) Species Density Distributions As Null Models for Ecologically Significant Interactions of Parasite Species in An Assemblage. *Ecol Model* 77: 189–196.
46. Rutrecht ST, Brown MJF (2008) The life-history impact and implications of multiple parasites for bumble bee queens. *Int J Parasitol* 38: 799–808.
47. Lipa JJ, Triggiani O (1996) Apicystis gen nov and Apicystis bombi (Liu, Macfarlane & Pengelly) comb nov (Protozoa: Neogregarinida), a cosmopolitan parasite of Bombus and Apis (Hymenoptera: Apidae). *Apidologie* 27: 29–34.
48. Cornman RS, Tarpay DR, Chen Y, Jeffreys L, Lopez D, et al. (2012) Pathogen webs in collapsing honey bee colonies. *Plos One* 7: e43562.
49. Yang B, Peng GD, Li TB, Kadowaki T (2013) Molecular and phylogenetic characterization of honey bee viruses, Nosema microsporidia, protozoan parasites, and parasitic mites in China. *Ecology and Evolution* 3: 298–311.

## Author Contributions

Conceived and designed the experiments: JR LD TW GS DCDG. Performed the experiments: JR JM IM. Analyzed the data: JR IM TW. Wrote the paper: JR IM LD TW GS DCDG.



50. Dainat B, Evans JD, Gauthier L, Neumann P (2012) *Crithidia melliferae* is widespread in Europe and can be used as a predictive marker of honeybee colony losses. 5th European Conference of Apidology.
51. Morimoto T, Kojima Y, Yoshiyama M, Kimura K, Yang B, et al. (2013) Molecular detection of protozoan parasites infecting *Apis mellifera* colonies in Japan. *Env Microbiol Rep* 5: 74–77.
52. Schmid-Hempel R, Tognazzo M (2010) Molecular Divergence Defines Two Distinct Lineages of *Crithidia bombi* (Trypanosomatidae), Parasites of Bumblebees. *J Eukaryot Microbiol* 57: 337–345.
53. Li JL, Qin HR, Wu J, Sadd BM, Wang XH, et al. (2012) The Prevalence of Parasites and Pathogens in Asian Honeybees *Apis cerana* in China. *Plos One* 7: e47955.
54. Schwarz RS, Evans JD (2013) Single and mixed-species trypanosome and microsporidia infections elicit distinct, ephemeral cellular and humoral immune responses in honey bees. *Dev Comp Immunol* 40: 300–310.
55. Higes M, Meana A, Bartolome C, Botias C, Martin-Hernandez R (2013) *Nosema ceranae* (Microsporidia), a controversial 21st century honey bee pathogen. *Env Microbiol Rep* 5: 17–29.
56. Granberg F, Vicente-Rubiano M, Rubio-Guerri C, Karlsson OE, Kukielka D, et al. (2013) Metagenomic detection of viral pathogens in spanish honeybees: co-infection by aphid lethal paralysis, Israel acute paralysis and lake sinai viruses. *Plos One* 8: e57459.
57. de Miranda JR, Gauthier L, Ribière M, Chen Y (2011) Honey Bee Viruses and Their Effect on Bee and Colony Health. In: Sammataro D, Yoder JA, editors. *Honey Bee Colony Health: Challenges and Sustainable Solutions*. CRC Press. 71–112.
58. Ahn JH, Hong IP, Bok JI, Kim BY, Song J, et al. (2012) Pyrosequencing analysis of the bacterial communities in the guts of honey bees *Apis cerana* and *Apis mellifera* in Korea. *J Microbiol* 50: 735–745.
59. Core A, Runckel C, Ivers J, Quock C, Siapno T, et al. (2012) A New Threat to Honey Bees, the Parasitic Phorid Fly *Apocephalus borealis*. *Plos One* 7: e29639.
60. Plischuk S, Meeus I, Smaghe G, Lange CE (2011) *Apicystis bombi* (Apicomplexa: Neogregarinorida) parasitizing *Apis mellifera* and *Bombus terrestris* (Hymenoptera: Apidae) in Argentina. *Env Microbiol Rep* 3: 565–568.
61. Arbetman MP, Meeus I, Morales CL, Aizen MA, Smaghe G (2013) Alien parasite hitchhikes to Patagonia on invasive bumblebee. *Biological Invasions* 15: 489–494.
62. Rasmont P, Coppee A, Michez D, De Meulemeester T (2008) An overview of the *Bombus terrestris* (L. 1758) subspecies (Hymenoptera : Apidae). *Annales de la Societe Entomologique de France* 44: 243–250.
